# Supplementary material
Source: Springer Nature journal article supplement (https://www.springermedizin.de/resource/supplementary/13012_2012_590_MOESM2_ESM.pdf/9630320)

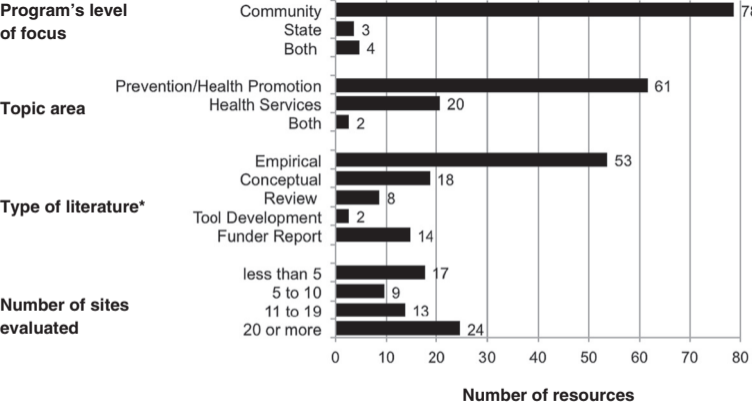

\*these categories are not mutually exclusive

Supplement: MOESM2 [file 9630320]
